# Supplementary material
Source: PubMed Central journal article supplement (PMC8691967)
Supplement: NIHMS1740544-supplement-Supplemental_Digital_Content_1.pdf [file NIHMS1740544-supplement-Supplemental_Digital_Content_1.pdf]

Appendix A: Participant Information and Self-Selected Frequency Range

Eight participants had Cochlear™ devices, three had MED-EL™ devices, and three had Advanced Bionics™ devices. All participants had clinical maps programmed with the default frequency allocation tables for their respective devices. All participants were unilaterally deafened as adults and were fluent speakers of English. A few participants had channels turned off and their acoustic models reflected that. There was one minor exception: there were two testing sessions where the analysis filter banks of the acoustic model had one more channel than the map in the speech processor, but the low- and high-frequency edges of the analysis filter bank were still the same as those in the participant’s Frequency Allocation Table.

| Subject | Device Manufacturer | Processor    | Implant             | Electrode         | Active Electrodes | Frequency Range of Device | Frequency Range of Self-Selected** | Tones (T) or Noise Bands (N) or Average (A) | Age   | Time Post Initial Stimulation (Years) | Onset       | Etiology       | Length of Deafness | Fig. 2 Bar Number (per Manufacturer) |
|---------|---------------------|--------------|---------------------|-------------------|-------------------|---------------------------|------------------------------------|---------------------------------------------|-------|---------------------------------------|-------------|----------------|--------------------|--------------------------------------|
| CI78    | Cochlear            | N5           | Nucleus Profile     | 512               | 22                | 188-7938                  | 626-8644                           | A                                           | 64.65 | 2.24                                  | Sudden      | Unknown        | 0.87               | 8                                    |
| CI78    | Cochlear            | N5           | Nucleus Profile     | 512               | 22                | 188-7938                  | 438-7938                           | A                                           | 65.51 | 3.10                                  | Sudden      | Unknown        | 0.87               | 5                                    |
| CI78    | Cochlear            | N5           | Nucleus Profile     | 512               | 22                | 188-7938                  | 313-12100                          | N                                           | 66.51 | 4.10                                  | Sudden      | Unknown        | 0.87               | 3                                    |
| CI146   | Cochlear            | N5           | Freedom             | 24RE              | 22                | 188-7938                  | 313-14924                          | N                                           | 36.84 | 0.29                                  | Sudden      | Labyrinthitis  | 0.62               | 4                                    |
| CI146   | Cochlear            | N5           | Freedom             | 24RE              | 22                | 188-7938                  | 188-14924                          | N                                           | 37.08 | 0.54                                  | Sudden      | Labyrinthitis  | 0.62               | 1                                    |
| CI167   | Cochlear            | N5           | Freedom             | 24RE              | 21*               | 188-7938                  | 188-14924                          | A                                           | 63.55 | 0.08                                  | Progressive | Meniere's      | NA^                | 2                                    |
| CI167   | Cochlear            | N5           | Freedom             | 24RE              | 21*               | 188-7938                  | 1188-5933                          | A                                           | 63.82 | 0.35                                  | Progressive | Meniere's      | NA^                | 14                                   |
| CI169   | Cochlear            | N5           | Freedom             | 24RE              | 21*               | 188-7938                  | 938-7938                           | T                                           | 27.49 | 0.14                                  | Sudden      | Unknown        | 1.21               | 11                                   |
| CI171   | Cochlear            | N5           | Freedom             | 24RE              | 22                | 188-7938                  | 563-6421                           | N                                           | 65.84 | 0.28                                  | Sudden      | Unknown        | 1.79               | 6                                    |
| CI171   | Cochlear            | N5           | Freedom             | 24RE              | 22                | 188-7938                  | 813-5188                           | N                                           | 67.01 | 1.45                                  | Sudden      | Unknown        | 1.79               | 9                                    |
| CI193   | Cochlear            | N6           | Freedom             | 24RE              | 22                | 188-7938                  | 1313-5188                          | T                                           | 63.05 | 0.46                                  | Sudden      | Unknown        | 1.72               | 16                                   |
| CI208   | Cochlear            | N6           | Nucleus Profile     | 512               | 22                | 188-7938                  | 1230-4562                          | A                                           | 64.45 | 0.13                                  | Sudden      | Unknown        | 0.58               | 15                                   |
| CI208   | Cochlear            | N6           | Nucleus Profile     | 512               | 22                | 188-7938                  | 1063-3372                          | N                                           | 64.92 | 0.60                                  | Sudden      | Unknown        | 0.58               | 12                                   |
| CI208   | Cochlear            | N6           | Nucleus Profile     | 512               | 22                | 188-7938                  | 1063-4186                          | T                                           | 65.94 | 1.61                                  | Sudden      | Unknown        | 0.58               | 13                                   |
| CI216   | Cochlear            | N6           | Nucleus Profile     | 512               | 22                | 188-7938                  | 813-7938                           | N                                           | 54.26 | 0.00                                  | Sudden      | Unknown        | 0.51               | 10                                   |
| CI216   | Cochlear            | N6           | Nucleus Profile     | 512               | 22                | 188-7938                  | 563-7938                           | N                                           | 54.42 | 0.17                                  | Sudden      | Unknown        | 0.51               | 7                                    |
| CI214   | MED-EL              | Sonnet       | Synchrony           | Flex28            | 12                | 100-8500                  | 50-6878                            | N                                           | 49.87 | 0.03                                  | Sudden      | Unknown        | 1.02               | 1                                    |
| CI214   | MED-EL              | Sonnet       | Synchrony           | Flex28            | 12                | 100-8500                  | 75-6477                            | A                                           | 50.03 | 0.20                                  | Sudden      | Unknown        | 1.02               | 2                                    |
| CI214   | MED-EL              | Sonnet       | Synchrony           | Flex28            | 12                | 100-8500                  | 100-7672                           | A                                           | 50.32 | 0.48                                  | Sudden      | Unknown        | 1.02               | 5                                    |
| CI214   | MED-EL              | Sonnet       | Synchrony           | Flex28            | 12                | 100-8500                  | 100-5560                           | N                                           | 51.25 | 1.42                                  | Sudden      | Unknown        | 1.02               | 3                                    |
| CI219   | MED-EL              | Sonnet       | Synchrony           | Flex28            | 11*               | 100-8500                  | 1227-4488                          | T                                           | 59.22 | 0.00                                  | Sudden      | Unknown        | 0.96               | 8                                    |
| CI219   | MED-EL              | Sonnet       | Synchrony           | Flex28            | 11*               | 100-8500                  | 100-6878                           | N                                           | 60.22 | 1.00                                  | Sudden      | Unknown        | 0.96               | 4                                    |
| CI220   | MED-EL              | Sonnet       | Synchrony           | Flex28            | 12                | 100-8500                  | 161-4488                           | T                                           | 66.02 | 0.00                                  | Progressive | Meniere's      | NA^                | 6                                    |
| CI220   | MED-EL              | Sonnet       | Synchrony           | Flex28            | 11*               | 100-8500                  | 161-5560                           | N                                           | 66.50 | 0.48                                  | Progressive | Meniere's      | NA^                | 7                                    |
| CI154   | AB                  | Naida CI Q70 | HiRes 90K           | HiFocus1J         | 16                | 250-8700                  | 250-10013                          | T                                           | 53.53 | 0.25                                  | Sudden      | Labyrinthitis  | 1.61               | 1                                    |
| CI154   | AB                  | Naida CI Q70 | HiRes 90K           | HiFocus1J         | 16                | 250-8700                  | 312-8700                           | T                                           | 53.71 | 0.43                                  | Sudden      | Labyrinthitis  | 1.61               | 3                                    |
| CI154   | AB                  | Naida CI Q70 | HiRes 90K           | HiFocus1J         | 16                | 250-8700                  | 281-11971                          | A                                           | 54.88 | 1.59                                  | Sudden      | Labyrinthitis  | 1.61               | 2                                    |
| CI162   | AB                  | Naida CI Q90 | HiRes 90K           | HiFocus1J         | 16                | 250-8700                  | 463-6560                           | T                                           | 48.13 | 0.56                                  | Sudden      | Peri-operative | 2.51               | 4                                    |
| CI212   | AB                  | Naida CI Q90 | HiRes 90K Advantage | HiFocus Mid-Scala | 16                | 250-8700                  | 556-15241                          | T                                           | 30.87 | 0.21                                  | Sudden      | Unknown        | 2.65               | 6                                    |
| CI212   | AB                  | Naida CI Q90 | HiRes 90K Advantage | HiFocus Mid-Scala | 16                | 250-8700                  | 556-11521                          | T                                           | 31.13 | 0.48                                  | Sudden      | Unknown        | 2.65               | 5                                    |
| CI212   | AB                  | Naida CI Q90 | HiRes 90K Advantage | HiFocus Mid-Scala | 16                | 250-8700                  | 625-12387                          | A                                           | 31.71 | 1.05                                  | Sudden      | Unknown        | 2.65               | 7                                    |

\*The participant had the most basal electrode deactivated

\*\*For tone models, sinusoidal tones are presented at the center frequency of the output noise band

^Two participants had progressive fluctuating hearing loss
