# Supplementary material
Source: PubMed Central journal article supplement (PMC8691967)
Supplement: NIHMS1740544-supplement-Supplemental_Digital_Content_2.pdf [file NIHMS1740544-supplement-Supplemental_Digital_Content_2.pdf]

Several acoustic models were created using either tone or noise vocoders. The output noise bands for the noise vocoders were adjacent in frequency and represented acoustic models spanning a wide frequency range selected to ensure coverage of the highest and lowest pitch percepts normally heard by CI users. For example, for Cochlear users the low frequency edge of the noise bands could assume 1 of 13 possible values (ranging from 63 Hz to 1,813 Hz), and the maximum could assume 1 of 9 possible values (ranging from 3,372 Hz to 18,938 Hz). This range of frequency allocation created 117 different acoustic models. Another 117 acoustic models were created using tone outputs, with the frequencies of the sinewaves being equal to the center frequencies of the corresponding bands in the noise band models. For MED-EL users, the minimum frequency had eleven possible values (ranging from 10 to 1227), and the maximum frequency had nine possible values (ranging from 3617 Hz to 18361 Hz). This resulted in 99 acoustic models using tone outputs and another 99 acoustic models using noise band outputs for MED-EL users. Likewise, acoustic models for Advanced Bionics users had 16 possible minimum frequency values, ranging from 16 to 1275Hz and 13 possible maximum frequency values (ranging from 3704 to 20,144Hz). This resulted in 208 acoustic models using tone outputs and another 208 acoustic models using noise outputs for Advanced Bionics participants. The frequency boundaries for the output noise bands were chosen, whenever possible, based on the frequency allocation tables that would be generated by clinical programming software defaults (Custom Sound, Maestro, or Soundwave software) for any given values of minimum and maximum frequency for a map. For output noise bands whose upper frequency boundary exceeded the limits of the corresponding programming software, frequency boundaries were extrapolated from default clinical maps using the same low frequency boundary and the maximum upper frequency. In all cases, vocoded acoustic model stimuli were generated using a sampling rate of 48,000 samples per second and a 20,000 Hz low pass filter. The analysis filters were sixth order band pass Butterworth filters. For each analysis filter, the temporal envelope was extracted by half wave rectification and third order Butterworth low pass filtering at 100 Hz. The extracted temporal envelopes were then used to modulate different sets of noise bands or tones.

### Cochlear Frequency Boundaries of Output Noise Bands - High Frequency 3372

| Channel | 1    | 2    | 3    | 4    | 5    | 6     | 7     | 8     | 9     | 10    | 11    | 12    | 13    |
|---------|------|------|------|------|------|-------|-------|-------|-------|-------|-------|-------|-------|
| 22      | 63   | 188  | 313  | 438  | 563  | 688   | 813   | 938   | 1063  | 1188  | 1313  | 1563  | 1813  |
| 21      | 188  | 313  | 438  | 563  | 688  | 813   | 938   | 1063  | 1188  | 1313  | 1438  | 1688  | 1938  |
| 20      | 313  | 438  | 563  | 688  | 813  | 938   | 1063  | 1188  | 1313  | 1438  | 1563  | 1813  | 2063  |
| 19      | 438  | 563  | 688  | 813  | 938  | 1063  | 1188  | 1313  | 1438  | 1563  | 1688  | 1938  | 2188  |
| 18      | 563  | 688  | 813  | 938  | 1063 | 1188  | 1313  | 1438  | 1563  | 1688  | 1813  | 2063  | 2313  |
| 17      | 688  | 813  | 938  | 1063 | 1188 | 1313  | 1438  | 1563  | 1688  | 1813  | 1938  | 2188  | 2438  |
| 16      | 813  | 938  | 1063 | 1188 | 1313 | 1438  | 1563  | 1688  | 1813  | 1938  | 2063  | 2313  | 2563  |
| 15      | 938  | 1063 | 1188 | 1313 | 1438 | 1563  | 1688  | 1813  | 1938  | 2063  | 2188  | 2438  | 2688  |
| 14      | 1063 | 1188 | 1313 | 1438 | 1563 | 1688  | 1813  | 1938  | 2063  | 2188  | 2313  | 2563  | 2813  |
| 13      | 1188 | 1313 | 1438 | 1563 | 1688 | 1813  | 1938  | 2063  | 2188  | 2313  | 2438  | 2688  | 2938  |
| 12      | 1313 | 1438 | 1563 | 1688 | 1813 | 1938  | 2063  | 2188  | 2313  | 2438  | 2563  | 2813  | 3063  |
| 11      | 1438 | 1563 | 1688 | 1813 | 1938 | 2063  | 2188  | 2313  | 2438  | 2563  | 2688  | 2938  | 3188  |
| 10      | 1563 | 1688 | 1813 | 1938 | 2063 | 2188  | 2313  | 2438  | 2563  | 2688  | 2813  | 3063  | 3313  |
| 9       | 1688 | 1813 | 1938 | 2063 | 2188 | 2313  | 2438  | 2563  | 2688  | 2813  | 2938  | 3188  | 3438  |
| 8       | 1813 | 1938 | 2063 | 2188 | 2313 | 2438  | 2563  | 2688  | 2813  | 2938  | 3063  | 3313  | 3563  |
| 7       | 1938 | 2063 | 2188 | 2313 | 2438 | 2563  | 2688  | 2813  | 2938  | 3063  | 3188  | 3438  | 3688  |
| 6       | 2063 | 2188 | 2313 | 2438 | 2563 | 2688  | 2813  | 2938  | 3063  | 3188  | 3313  | 3563  | 3813  |
| 5       | 2188 | 2313 | 2438 | 2563 | 2688 | 2813  | 2938  | 3063  | 3188  | 3313  | 3438  | 3688  | 3938  |
| 4       | 2438 | 2438 | 2563 | 2688 | 2813 | 2938  | 3063  | 3188  | 3313  | 3438  | 3563  | 3813  | 4063  |
| 3       | 2688 | 2688 | 2688 | 2813 | 2938 | 3063  | 3188  | 3313  | 3438  | 3563  | 3688  | 3938  | 4188  |
| 2       | 2938 | 2938 | 2938 | 2938 | 3063 | 3188  | 3313  | 3438  | 3563  | 3688  | 3813  | 4063  | 4313  |
| 1       | 3188 | 3188 | 3188 | 3188 | 3188 | 3313  | 3438  | 3563  | 3688  | 3813  | 3938  | 4188  | 4438  |
|         | 3372 | 3372 | 3372 | 3372 | 3372 | 3438* | 3563* | 3688* | 3813* | 3938* | 4063* | 4313* | 4563* |

### Cochlear Frequency Boundaries of Output Noise Bands - High Frequency 4186

| Channel | 1    | 2    | 3    | 4    | 5    | 6    | 7    | 8    | 9    | 10   | 11   | 12    | 13    |
|---------|------|------|------|------|------|------|------|------|------|------|------|-------|-------|
| 22      | 63   | 188  | 313  | 438  | 563  | 688  | 813  | 938  | 1063 | 1188 | 1313 | 1563  | 1813  |
| 21      | 188  | 313  | 438  | 563  | 688  | 813  | 938  | 1063 | 1188 | 1313 | 1438 | 1688  | 1938  |
| 20      | 313  | 438  | 563  | 688  | 813  | 938  | 1063 | 1188 | 1313 | 1438 | 1563 | 1813  | 2063  |
| 19      | 438  | 563  | 688  | 813  | 938  | 1063 | 1188 | 1313 | 1438 | 1563 | 1688 | 1938  | 2188  |
| 18      | 563  | 688  | 813  | 938  | 1063 | 1188 | 1313 | 1438 | 1563 | 1688 | 1813 | 2063  | 2313  |
| 17      | 688  | 813  | 938  | 1063 | 1188 | 1313 | 1438 | 1563 | 1688 | 1813 | 1938 | 2188  | 2438  |
| 16      | 813  | 938  | 1063 | 1188 | 1313 | 1438 | 1563 | 1688 | 1813 | 1938 | 2063 | 2313  | 2563  |
| 15      | 938  | 1063 | 1188 | 1313 | 1438 | 1563 | 1688 | 1813 | 1938 | 2063 | 2188 | 2438  | 2688  |
| 14      | 1063 | 1188 | 1313 | 1438 | 1563 | 1688 | 1813 | 1938 | 2063 | 2188 | 2313 | 2563  | 2813  |
| 13      | 1188 | 1313 | 1438 | 1563 | 1688 | 1813 | 1938 | 2063 | 2188 | 2313 | 2438 | 2688  | 2938  |
| 12      | 1313 | 1438 | 1563 | 1688 | 1813 | 1938 | 2063 | 2188 | 2313 | 2438 | 2563 | 2813  | 3063  |
| 11      | 1438 | 1563 | 1688 | 1813 | 1938 | 2063 | 2188 | 2313 | 2438 | 2563 | 2688 | 2938  | 3188  |
| 10      | 1563 | 1688 | 1813 | 1938 | 2063 | 2188 | 2313 | 2438 | 2563 | 2688 | 2813 | 3063  | 3313  |
| 9       | 1688 | 1813 | 1938 | 2063 | 2188 | 2313 | 2438 | 2563 | 2688 | 2813 | 2938 | 3188  | 3438  |
| 8       | 1813 | 1938 | 2063 | 2188 | 2313 | 2438 | 2563 | 2688 | 2813 | 2938 | 3063 | 3313  | 3563  |
| 7       | 2063 | 2188 | 2313 | 2313 | 2438 | 2563 | 2688 | 2813 | 2938 | 3063 | 3188 | 3438  | 3688  |
| 6       | 2313 | 2438 | 2563 | 2563 | 2688 | 2688 | 2813 | 2938 | 3063 | 3188 | 3313 | 3563  | 3813  |
| 5       | 2563 | 2688 | 2813 | 2813 | 2938 | 2938 | 3063 | 3063 | 3188 | 3313 | 3438 | 3688  | 3938  |
| 4       | 2813 | 2938 | 3063 | 3063 | 3188 | 3188 | 3313 | 3313 | 3313 | 3438 | 3563 | 3813  | 4063  |
| 3       | 3063 | 3188 | 3313 | 3313 | 3438 | 3438 | 3563 | 3563 | 3563 | 3563 | 3688 | 3938  | 4188  |
| 2       | 3438 | 3438 | 3563 | 3563 | 3688 | 3688 | 3813 | 3813 | 3813 | 3813 | 3813 | 4063  | 4313  |
| 1       | 3813 | 3813 | 3813 | 3813 | 3938 | 3938 | 3938 | 3938 | 3938 | 3938 | 3938 | 4188  | 4438  |
|         | 4186 | 4186 | 4186 | 4186 | 4186 | 4186 | 4186 | 4186 | 4186 | 4186 | 4186 | 4313* | 4563* |

\*Bandwidth was adjusted to 125 (the minimum) resulting in a slight change in the frequency range
